# Supplementary material
Source: MDPI journal article supplement (https://www.mdpi.com/2409-515X/8/1/5)
Supplement: s1 [file s1]

## CRMS/CFSPID Questionnaire

There are 3 sections to the survey: Section 1: Collects demographic details; Section 2: Asks about the initial assessment; Section 3: Asks about ongoing management

---

### Start of Block: DEMOGRAPHIC DATA

#### Section 1: This section will include demographic questions

---

Q1 In which country do you currently work?

---

Q2 Please can you specify the state or region you work within in this country?

---

Q3 What best describes your current job title?

- ☐ Doctor
  - ☐ Nurse
  - ☐ Laboratory staff
  - ☐ Genetic Counsellor
  - ☐ Centre Director
  - ☐ Professor / Associate Professor
  - ☐ Research Scientist
  - ☐ Newborn Screening Coordinator
  - ☐ Other, please state 

---
-

Q4 What are your professional qualifications?

☐

MD

☐

PhD

☐

MSc

☐

BSc

☐

RN

☐

Other, please state \_\_\_\_\_

---

Q5 How many years have you worked with children with cystic fibrosis and their families?

\_\_\_\_\_

Q6 How many years have you worked with children with a designation of CFTR-related metabolic syndrome/cystic fibrosis screen positive, inconclusive diagnosis (CRMS/ CFSPID)?

\_\_\_\_\_

End of Block: DEMOGRAPHIC DATA

---

Start of Block: Following the initial NBS result

**Section 2: These questions relate to your initial assessment following the Newborn Bloodspot Screening (NBS) result**

Q7 Please could you give a brief summary of the information you provide when communicating a CRMS/CFSPID NBS result to families during their initial consultation

---

---

---

---

---

Q8 During the initial assessment following the NBS result, which tests would you perform?

- ☐ Clinical assessment (including respiratory, abdominal and nutritional assessment)
- ☐ Sweat test
- ☐ Extended CFTR analysis (if the genotype is incomplete)
- ☐ Collection of a stool sample for measurement of fecal elastase
- ☐ Other(s), please specify \_\_\_\_\_

End of Block: Following the initial NBS result

---

Start of Block: Ongoing management

### Section 3: Ongoing management

---

Q9 Currently, there are two categories for children with a designation of CRMS/CFSPID

1. Normal sweat chloride (< 30mmol/L) and two CFTR mutations, at least one of which has unclear phenotypic consequences
2. Intermediate sweat chloride value (30-59 mmol/L) and one or no CFTR mutations

Do you manage these children differently?

☐ Yes

☐ No

*Skip To: Q If Currently, there are two categories for children with a designation of CRMS/CFSPID 1. Normal swea... = No*

*Skip To: Q If Currently, there are two categories for children with a designation of CRMS/CFSPID 1. Normal swea... = Yes*

Q10 In what way(s) do you manage the CRMS/CFSPID categories differently?

---

Q11 Do you follow up infants with a CRMS/CFSPID designation in a specialist CF clinic?

☐ Yes

☐ No

*Skip To: Q If Do you follow up infants with a CRMS/CFSPID designation in a specialist CF clinic? = Yes*

*Skip To: Q If Do you follow up infants with a CRMS/CFSPID designation in a specialist CF clinic? = No*

Q12 Do any policies exist to ensure the infant is not exposed to any increased risk of cross infection?

☐ Yes

☐ No

*Skip To: Q If Do any policies exist to ensure the infant is not exposed to any increased risk of cross infection? = Yes*

*Skip To: Q16 If Do any policies exist to ensure the infant is not exposed to any increased risk of cross infection? = No*

Q13 Is there any reason why you do not have a policy in place to ensure the infant is not exposed to any increased risk of cross infection?

- ☐ We do not feel it is necessary
  - ☐ We do not have the capacity (time, space or staff)
  - ☐ Other, please specify \_\_\_\_\_
- 

Q14 Please could you briefly describe what these policies consist of.

- ☐ Each child and family placed in a separate room
  - ☐ Staff are required to wear gloves and apron when with the child and family
  - ☐ Staff are required to wash their hands prior to and after the consultation
  - ☐ Children with CFSPID are seen in a separate clinic to children with CF
  - ☐ Children with CFSPID are seen in the same clinic as children with CF but either at the beginning or end of the clinic
  - ☐ Other, please specify \_\_\_\_\_
- 

*Display This Question:*

*If Do you follow up infants with a CRMS/CFSPID designation in a specialist CF clinic? = No*

Q15 Are there any reasons why you do not follow these infants up in a specialist clinic?

☐

We do not feel there is any need to see these children in a specialist CF clinic

☐

CF

We do not have the capacity (time or staff) to see these children as well as children with

☐

We think this might confuse parents and make them think their child has CF

☐

Other, please specify \_\_\_\_\_

Q16 Do you offer these infants a repeat sweat test at any point

☐

Yes

☐

No

*Skip To: Q If Do you offer these infants a repeat sweat test at any point = Yes*

*Skip To: Q If Do you offer these infants a repeat sweat test at any point = No*

Q17 At what age do you offer the repeat sweat test?

☐

6 months

☐

1 year

☐

18 months

☐

2 years

☐

Other, please specify \_\_\_\_\_

*Display This Question:*

*If Do you offer these infants a repeat sweat test at any point = No*

Q18 Is there any reason(s) why you do not offer a repeat sweat test?

- ☐ We do not feel it is necessary
  - ☐ We do not have the resources (time, staff, finances)
  - ☐ We feel it causes parents unnecessary anxiety
  - ☐ Other, please state \_\_\_\_\_
- 

Q19 What clinical or other information (e.g. parental anxiety) would you take into consideration when determining how frequently you review these children?

- ☐ NBS result
  - ☐ Sweat Chloride
  - ☐ Clinical assessment (including respiratory, abdominal and nutritional assessment)
  - ☐ Pulmonary function
  - ☐ Chest X-ray
  - ☐ Magnetic resonance imaging of chest
  - ☐ Chest computerized tomography scan
  - ☐ Cough swab / respiratory cultures
  - ☐ Parental anxiety
  - ☐ Other, please specify \_\_\_\_\_
-

Q20 For infants that have no clinical concerns, how frequently would you review them after 12 months of age?

- ☐ Annually
- ☐ Every two years
- ☐ We would not routinely review them
- ☐ Other, please state \_\_\_\_\_

*Skip To: Q If For infants that have no clinical concerns, how frequently would you review them after 12 months... = We would not routinely review them*

---

Q21 Please indicate which tests or measurements children would have during or in preparation for their review appointment (if this is always the same, please indicate in the 'we undertake the following' column, if this different depending on the age of the child, please indicate this using the relevant age columns)

|                                                  | We<br>undertake<br>the following<br>(16) | Age<br>d 1<br>year<br>(1) | Age<br>d 2<br>year<br>s (2) | Age<br>d 3<br>year<br>s (3) | Age<br>d 4<br>year<br>s (4) | Age<br>d 5<br>year<br>s (5) | Age<br>d 6<br>year<br>s (6) | Age<br>d 7<br>year<br>s (7) | Age<br>d 8<br>year<br>s (8) | Age<br>d 9<br>year<br>s (9) | Age<br>d 10<br>year<br>s (10) | Age<br>d 11<br>year<br>s (11) | Age<br>d 12<br>year<br>s (12) | Age<br>d 13<br>year<br>s (13) | Age<br>d 14<br>year<br>s (14) | Age<br>d 15<br>year<br>s (15) |
|--------------------------------------------------|------------------------------------------|---------------------------|-----------------------------|-----------------------------|-----------------------------|-----------------------------|-----------------------------|-----------------------------|-----------------------------|-----------------------------|-------------------------------|-------------------------------|-------------------------------|-------------------------------|-------------------------------|-------------------------------|
| Full blood<br>count /<br>Complete<br>blood count | <input type="checkbox"/>                 | <input type="checkbox"/>  | <input type="checkbox"/>    | <input type="checkbox"/>    | <input type="checkbox"/>    | <input type="checkbox"/>    | <input type="checkbox"/>    | <input type="checkbox"/>    | <input type="checkbox"/>    | <input type="checkbox"/>    | <input type="checkbox"/>      | <input type="checkbox"/>      | <input type="checkbox"/>      | <input type="checkbox"/>      | <input type="checkbox"/>      | <input type="checkbox"/>      |
| Urea and<br>electrolytes                         | <input type="checkbox"/>                 | <input type="checkbox"/>  | <input type="checkbox"/>    | <input type="checkbox"/>    | <input type="checkbox"/>    | <input type="checkbox"/>    | <input type="checkbox"/>    | <input type="checkbox"/>    | <input type="checkbox"/>    | <input type="checkbox"/>    | <input type="checkbox"/>      | <input type="checkbox"/>      | <input type="checkbox"/>      | <input type="checkbox"/>      | <input type="checkbox"/>      | <input type="checkbox"/>      |
| Pulmonary<br>function                            | <input type="checkbox"/>                 | <input type="checkbox"/>  | <input type="checkbox"/>    | <input type="checkbox"/>    | <input type="checkbox"/>    | <input type="checkbox"/>    | <input type="checkbox"/>    | <input type="checkbox"/>    | <input type="checkbox"/>    | <input type="checkbox"/>    | <input type="checkbox"/>      | <input type="checkbox"/>      | <input type="checkbox"/>      | <input type="checkbox"/>      | <input type="checkbox"/>      | <input type="checkbox"/>      |
| Chest X-ray                                      | <input type="checkbox"/>                 | <input type="checkbox"/>  | <input type="checkbox"/>    | <input type="checkbox"/>    | <input type="checkbox"/>    | <input type="checkbox"/>    | <input type="checkbox"/>    | <input type="checkbox"/>    | <input type="checkbox"/>    | <input type="checkbox"/>    | <input type="checkbox"/>      | <input type="checkbox"/>      | <input type="checkbox"/>      | <input type="checkbox"/>      | <input type="checkbox"/>      | <input type="checkbox"/>      |
| Magnetic<br>resonance<br>imaging of<br>chest     | <input type="checkbox"/>                 | <input type="checkbox"/>  | <input type="checkbox"/>    | <input type="checkbox"/>    | <input type="checkbox"/>    | <input type="checkbox"/>    | <input type="checkbox"/>    | <input type="checkbox"/>    | <input type="checkbox"/>    | <input type="checkbox"/>    | <input type="checkbox"/>      | <input type="checkbox"/>      | <input type="checkbox"/>      | <input type="checkbox"/>      | <input type="checkbox"/>      | <input type="checkbox"/>      |
| Chest<br>computerized<br>tomography<br>scan      | <input type="checkbox"/>                 | <input type="checkbox"/>  | <input type="checkbox"/>    | <input type="checkbox"/>    | <input type="checkbox"/>    | <input type="checkbox"/>    | <input type="checkbox"/>    | <input type="checkbox"/>    | <input type="checkbox"/>    | <input type="checkbox"/>    | <input type="checkbox"/>      | <input type="checkbox"/>      | <input type="checkbox"/>      | <input type="checkbox"/>      | <input type="checkbox"/>      | <input type="checkbox"/>      |
| Bronchoalveo<br>lar lavage                       | <input type="checkbox"/>                 | <input type="checkbox"/>  | <input type="checkbox"/>    | <input type="checkbox"/>    | <input type="checkbox"/>    | <input type="checkbox"/>    | <input type="checkbox"/>    | <input type="checkbox"/>    | <input type="checkbox"/>    | <input type="checkbox"/>    | <input type="checkbox"/>      | <input type="checkbox"/>      | <input type="checkbox"/>      | <input type="checkbox"/>      | <input type="checkbox"/>      | <input type="checkbox"/>      |

|                                         |                          |                          |                          |                          |                          |                          |                          |                          |                          |                          |                          |                          |                          |                          |                          |
|-----------------------------------------|--------------------------|--------------------------|--------------------------|--------------------------|--------------------------|--------------------------|--------------------------|--------------------------|--------------------------|--------------------------|--------------------------|--------------------------|--------------------------|--------------------------|--------------------------|
| Cough swab /<br>respiratory<br>cultures | <input type="checkbox"/> |
| Stool sample<br>for fecal<br>elastase   | <input type="checkbox"/> |
| Other, please<br>specify                | <input type="checkbox"/> |
| Other, please<br>specify                | <input type="checkbox"/> |

---

Q22 Do you review the CFTR-2 / CFTR-France website prior to the review?

☐ Yes

☐ No

*Skip To: Q If Do you review the CFTR-2 / CFTR-France website prior to the review? = Yes*

*Skip To: Q If Do you review the CFTR-2 / CFTR-France website prior to the review? = No*

Q23 Are there any reasons why you do not review the CFTR-2 / CFTR-France website prior to the review?

☐

Difficult to access

☐

Time consuming to access

☐

I do not feel the information is relevant for the purposes of the annual review

☐

I do not feel the information is useful for the purposes of the annual review

☐

Other, please specify

Q24 Why do you do this and do you find it useful?

---

Q25 Do you do any respiratory cultures at the review appointment or at any other times?

☐ Yes

☐ No

*Skip To: Q If Do you do any respiratory cultures at the review appointment or at any other times? = No*

*Skip To: Q If Do you do any respiratory cultures at the review appointment or at any other times? = Yes*

Q26 How frequently do you do respiratory cultures?

- ☐ Monthly
- ☐ Every 2 months
- ☐ Every 3 months
- ☐ Every 6 months
- ☐ Annually
- ☐ Other, please specify \_\_\_\_\_

---

*Display This Question:*

*If Do you do any respiratory cultures at the review appointment or at any other times? = No*

Q27 Why do you not do respiratory cultures at the review appointment?

- ☐ Too time consuming
- ☐ Do not have the resources (time, staff, finances)
- ☐ Do not feel this information informs the annual review
- ☐ Other, please specify \_\_\_\_\_

---

*Display This Question:*

*If For infants that have no clinical concerns, how frequently would you review them after 12 months...  
= We would not routinely review them*

Q28 Are there any reason(s) why you do not offer routine review(s)?

- ☐ We do not have capacity (time, space, staff, finances)
  - ☐ We feel it makes families more anxious
  - ☐ We do not believe there is any evidence to suggest this is beneficial
  - ☐ We do not feel there is any need to see these children routinely
  - ☐ other, please specify \_\_\_\_\_
- 

Q29 What information do you give to families regarding when they should seek additional medical advice about their child?

- ☐ Failure to gain weight adequately
  - ☐ Persistent loose stools
  - ☐ Persistent respiratory symptoms (more than 2 weeks)
  - ☐ Other, please specify \_\_\_\_\_
- 

Q30 What information do you give to the primary care physician / general practitioner regarding when they should seek additional medical advice about their child?

- ☐ Failure to gain weight adequately
- ☐ Persistent loose stool
- ☐ Persistent respiratory symptoms (more than 2 weeks)
- ☐ Other, please specify \_\_\_\_\_

---

Q31 What advice to you give to families regarding their child's immunisations?

- ☐ Children should follow the national immunisation programme
- ☐ Parents should avoid specific immunisations, please state which ones  
\_\_\_\_\_
- ☐ Parents should delay specific immunisations, please state which ones  
\_\_\_\_\_
- ☐ Other, please state \_\_\_\_\_

---

Q32 What health promotion advice do you give to families of these infants?

- ☐ Children should not be exposed to cigarette smoke
- ☐ Children and their families should be encouraged to adopt a healthy lifestyle consistent with national guidance on exercise, nutrition and other aspects of public health policy
- ☐ The family should avoid keeping pets if at all possible
- ☐ Other, please specify \_\_\_\_\_

---

Q33 Do you offer families a referral for genetic counselling

- ☐ Yes
- ☐ No

*Skip To: Q If Do you offer families a referral for genetic counselling = Yes*

*Skip To: Q If Do you offer families a referral for genetic counselling = No*

---

Q34 When do you normally discuss this / make the referral?

- ☐ At the initial consultation with the family
  - ☐ During the annual review
  - ☐ Other, please specify \_\_\_\_\_
- 

Q35 How long does it normally take after the referral before the family is seen by the genetic service?

- ☐ 1 week
  - ☐ 1 month
  - ☐ 2 months
  - ☐ 3 months
  - ☐ 6 months
  - ☐ 1 year
  - ☐ Other, please specify \_\_\_\_\_
- 

*Display This Question:*

*If Do you offer families a referral for genetic counselling = No*

Q36 Is there any reason why you do not make a referral for genetic counselling?

- ☐ I do not feel it is necessary
  - ☐ Parents have not requested this
  - ☐ It is not part of our policy
  - ☐ I think this adds to parental anxiety
  - ☐ Other, please specify \_\_\_\_\_
- 

Q37 Is there a national database where the infants' details can be stored?

- ☐ Yes, we use the CF-registry
  - ☐ Yes, we have a separate CRMS/CFSPID-registry
  - ☐ No
- 

Q38 The updated guidance from the ECFS working group suggests children with CRMS/CFSPID who reach 6 years of age in good health with normal growth, lung function and imaging and normal sweat chloride values (<30 mmol/L) are unlikely to convert to a diagnosis of CF. In this instance, which option for further care do you currently support:

- ☐ Discharge from CF specialist care, with follow-up in primary care by PCP.
  - ☐ Discharge from CF specialist care, but a further isolated specialist review as the child reaches adolescence (at the age of around 14-16 years, see below). This option gives the opportunity for more direct engagement with the young person.
  - ☐ Continue regular specialist review under the CRMS/CFSPID designation, either as part of the CF clinic or in a separate clinic (could be undertaken 'virtually' for example as an annual telephone call or video consultation).
  - ☐ Other, please specify \_\_\_\_\_
-

Q39 The updated guidance for CRMS/CFSPID from the ECFS working group suggests that for children with CRMS/CFSPID who are discharged from specialist care, a subsequent review should be considered when the child is a young adult, to communicate the information directly to them. Do you think this type of review should be organised?

☐ Yes

☐ No

*Skip To: Q If The updated guidance for CRMS/CFSPID from the ECFS working group suggests that for children with... = Yes*

*Skip To: End of Block If The updated guidance for CRMS/CFSPID from the ECFS working group suggests that for children with... = No*

---

Q40 At what age do you think the review should take place?

---

End of Block: Ongoing management

---

Start of Block: Thank you

**You have reached the end of the survey. Thank you for taking part in this research. If you would like further information, please contact the research team.**

End of Block: Thank you

---
